# Supplementary material
Source: PubMed Central journal article supplement (PMC9629699)
Supplement: mmc1.pdf [file mmc1.pdf]

# THE LANCET

## Infectious Diseases

### Supplementary appendix

This appendix formed part of the original submission and has been peer reviewed. We post it as supplied by the authors.

Supplement to: Rojek A, Dunning J, Olliaro P. Monkeypox: how will we know if the treatments work? *Lancet Infect Dis* 2022; published online Aug 2. [https://doi.org/10.1016/S1473-3099\(22\)00514-X](https://doi.org/10.1016/S1473-3099(22)00514-X).

| Table 1: Options for <b>primary</b> outcomes for clinical trials evaluating treatment safety and efficacy for Monkeypox.                                                            |                                                                                                                                                                                                                        |                                                                                                            |                                                                                                                                                                          |                                                                                                                                                                                                                                                                                                                                                                                                                                                                                    |
|-------------------------------------------------------------------------------------------------------------------------------------------------------------------------------------|------------------------------------------------------------------------------------------------------------------------------------------------------------------------------------------------------------------------|------------------------------------------------------------------------------------------------------------|--------------------------------------------------------------------------------------------------------------------------------------------------------------------------|------------------------------------------------------------------------------------------------------------------------------------------------------------------------------------------------------------------------------------------------------------------------------------------------------------------------------------------------------------------------------------------------------------------------------------------------------------------------------------|
| Proposed outcome                                                                                                                                                                    | Possible variations                                                                                                                                                                                                    | Best suited to                                                                                             | Pros                                                                                                                                                                     | Cons                                                                                                                                                                                                                                                                                                                                                                                                                                                                               |
| <b>Time to lesion resolution</b>                                                                                                                                                    | <ul style="list-style-type: none"> <li>• Time to resolution of <i>active</i> lesions</li> <li>• Time to <i>complete resolution</i> of all lesions</li> <li>• Proportion of (<i>active</i>) lesions resolved</li> </ul> | Typical disease in patients without complications                                                          | <ul style="list-style-type: none"> <li>• ‘Time-to’ analysis</li> <li>• Patient focused outcome.</li> <li>• Possibly the best clinical proxy of infectiousness</li> </ul> | <ul style="list-style-type: none"> <li>• Fails to capture patients without lesions</li> <li>• Fails to capture other manifestations (e.g. proctitis)</li> <li>• Healing time impacted by bacterial super-infection or surgical intervention</li> <li>• Inter-rater reliability of defining lesion not known.</li> <li>• No agreed definition of an <i>active</i> lesion or <i>completely resolved</i> lesion</li> <li>• Difficult to assess mucosal and genital lesions</li> </ul> |
| <b>Viral kinetics</b>                                                                                                                                                               | <ul style="list-style-type: none"> <li>• Variation in site – throat, blood, lesion that sample collected</li> <li>• Time to negative sample vs more detailed kinetics</li> <li>• PCR vs viral culture</li> </ul>       | Inpatients                                                                                                 | <ul style="list-style-type: none"> <li>• ‘Time to’ analysis</li> <li>• More direct correlation with antiviral effect.</li> </ul>                                         | <ul style="list-style-type: none"> <li>• Difficulty obtaining samples in isolating patients</li> <li>• Pain or inconvenience of sampling for patients</li> <li>• Lack of longitudinal biologic sampling available in literature to inform design</li> <li>• Detection by PCR may not represent detection of live virus</li> </ul>                                                                                                                                                  |
| <b>Composite ordinal scale e.g.</b><br>a) All active lesions resolved<br>b) Active lesions<br>c) Hospitalised with complicated monkeypox<br>d) Death                                | Many possible                                                                                                                                                                                                          | <ul style="list-style-type: none"> <li>• Severe disease</li> <li>• Diverse disease presentation</li> </ul> | <ul style="list-style-type: none"> <li>• Patient focused outcome</li> <li>• Ordinal scale analysis</li> </ul>                                                            | <ul style="list-style-type: none"> <li>• Difficulty with ensuring mutual exclusivity of elements of the scale</li> <li>• No agreed definition on <i>severe</i> or <i>complicated</i> monkeypox</li> <li>• Fails when there is a narrow spectrum of disease severity</li> </ul>                                                                                                                                                                                                     |
| <b>Lesion-based ordinal scale e.g.</b><br>(a) All lesions completely resolved<br>b) All active lesions resolved<br>c) Active lesions but no new lesions<br>d) New lesions occurring | Many possible                                                                                                                                                                                                          | Non-hospitalised patients with low risk of death.                                                          | <ul style="list-style-type: none"> <li>• Patient focused outcome</li> <li>• Ordinal scale analysis</li> </ul>                                                            | <ul style="list-style-type: none"> <li>• Fails to capture patients without lesions</li> <li>• Fails to capture other manifestations (e.g. proctitis)</li> <li>• Healing time impacted by bacterial super-infection or surgical intervention</li> <li>• Inter-rater reliability of defining lesion not known.</li> <li>• No agreed definition of an <i>active</i> lesion or <i>completely resolved</i> lesion</li> <li>• Difficult to assess mucosal and genital lesions</li> </ul> |
